# Supplementary material for: Bidirectional Associations between Parental Feeding Practices and Child Eating Behaviors in a Chinese Sample
Source: MDPI journal article supplement (doi:10.3390/nu16010044), 2023-12-22
Supplement: s1 [file s1]

### Supplementary materials

**Supplementary Table S1.** Bivariate analysis with caregivers and child characteristics, as independent variables, and caregivers' feeding practices, child eating behaviors, as the dependent variable.

| Variables at T1               | Encouragement of Healthy Eating | Modelling | Monitoring | Content Restricted Feeding | Pressure to Eat | Food as a Reward | Food Fussiness | Food Responsiveness | Satiety Responsiveness | Unhealthy Eating Habits | Initiative Eating |
|-------------------------------|---------------------------------|-----------|------------|----------------------------|-----------------|------------------|----------------|---------------------|------------------------|-------------------------|-------------------|
| <b>Child sex</b>              |                                 |           |            |                            |                 |                  |                |                     |                        |                         |                   |
| Boys                          | 4.08±0.51                       | 4.11±0.59 | 4.05±0.82  | 3.42±0.82                  | 3.24±0.83       | 3.22±0.75        | 3.03±0.63      | 2.44±0.53           | 2.68±0.69              | 2.53±0.81               | 3.43±0.67         |
| Girls                         | 4.15±0.50                       | 4.13±0.54 | 4.07±0.79  | 3.48±0.77                  | 3.19±0.87       | 3.32±0.75        | 2.97±0.67      | 2.45±0.61           | 2.62±0.67              | 2.44±0.81               | 3.49±0.68         |
| t                             | -1.898                          | -0.482    | -0.427     | -1.105                     | 0.883           | -1.785           | 1.348          | -0.142              | 1.323                  | 1.584                   | -1.143            |
| P                             | 0.058                           | 0.630     | 0.669      | 0.269                      | 0.377           | 0.075            | 0.178          | 0.887               | 0.186                  | 0.114                   | 0.253             |
| <b>Child weight status</b>    |                                 |           |            |                            |                 |                  |                |                     |                        |                         |                   |
| Underweight                   | 4.40±0.31                       | 4.20±0.71 | 4.25±1.04  | 3.61±0.87                  | 3.21±0.71       | 3.14±0.90        | 2.58±0.66      | 2.31±0.45           | 2.82±0.72              | 2.54±0.85               | 3.54±0.64         |
| Normal weight                 | 4.12±0.50                       | 4.12±0.55 | 4.06±0.77  | 3.45±0.78                  | 3.26±0.83       | 3.28±0.74        | 3.00±0.64      | 2.41±0.54           | 2.69±0.67              | 2.55±0.81               | 3.41±0.67         |
| Overweight or Obesity         | 4.04±0.59                       | 4.08±0.60 | 3.98±0.89  | 3.42±0.87                  | 3.00±0.94       | 3.27±0.80        | 3.12±0.65      | 2.64±0.68           | 2.39±0.67              | 2.21±0.73               | 3.69±0.66         |
| F                             | 5.570                           | 0.560     | 1.420      | 0.571                      | 5.257           | 0.390            | 7.573          | 10.368              | 12.937                 | 10.214                  | 10.184            |
| P                             | 0.004**                         | 0.571     | 0.242      | 0.565                      | 0.005**         | 0.677            | 0.001**        | 0.000***            | 0.000***               | 0.000***                | 0.000***          |
| <b>The role of caregivers</b> |                                 |           |            |                            |                 |                  |                |                     |                        |                         |                   |
| Mothers                       | 4.12±0.51                       | 4.10±0.58 | 4.05±0.81  | 3.45±0.80                  | 3.19±0.86       | 3.26±0.76        | 3.01±0.64      | 2.43±0.56           | 2.65±0.69              | 2.50±0.82               | 3.45±0.67         |
| Fathers                       | 4.07±0.50                       | 4.18±0.49 | 4.08±0.78  | 3.44±0.78                  | 3.36±0.79       | 3.32±0.70        | 2.98±0.70      | 2.53±0.61           | 2.63±0.67              | 2.44±0.76               | 3.51±0.66         |

[illegible]

| <b>Variables at T1</b>               | <b>Encouragement of Healthy Eating</b> | <b>Modelling</b> | <b>Monitoring</b> | <b>Content Restricted Feeding</b> | <b>Pressure to Eat</b> | <b>Food as a Reward</b> | <b>Food Fussiness</b> | <b>Food Responsiveness</b> | <b>Satiety Responsiveness</b> | <b>Unhealthy Eating Habits</b> | <b>Initiative Eating</b> |
|--------------------------------------|----------------------------------------|------------------|-------------------|-----------------------------------|------------------------|-------------------------|-----------------------|----------------------------|-------------------------------|--------------------------------|--------------------------|
| Senior high school or below          | 4.07±0.51                              | 4.11±0.59        | 4.10±0.78         | 3.58±0.80                         | 3.15±0.91              | 3.20±0.75               | 3.09±0.57             | 2.48±0.56                  | 2.78±0.69                     | 2.56±0.87                      | 3.44±0.74                |
| College or higher                    | 4.11±0.51                              | 4.12±0.57        | 4.05±0.81         | 3.43±0.80                         | 3.22±0.84              | 3.28±0.75               | 3.0±0.65              | 2.44±0.57                  | 2.63±0.68                     | 2.48±0.80                      | 3.47±0.67                |
| t                                    | -0.777                                 | -0.017           | 0.453             | 1.528                             | -0.710                 | -0.811                  | 1.236                 | 0.533                      | 1.867                         | 0.849                          | -0.377                   |
| <i>P</i>                             | 0.437                                  | 0.986            | 0.651             | 0.127                             | 0.478                  | 0.418                   | 0.217                 | 0.595                      | 0.062                         | 0.396                          | 0.706                    |
| <b>Number of the children</b>        |                                        |                  |                   |                                   |                        |                         |                       |                            |                               |                                |                          |
| One                                  | 4.12±0.51                              | 4.08±0.58        | 4.07±0.82         | 3.44±0.80                         | 3.18±0.85              | 3.30±0.77               | 3.03±0.66             | 2.44±0.57                  | 2.63±0.69                     | 2.52±0.83                      | 3.43±0.68                |
| Two or more                          | 4.10±0.52                              | 4.18±0.54        | 4.04±0.78         | 3.47±0.79                         | 3.29±0.84              | 3.23±0.72               | 2.96±0.63             | 2.45±0.56                  | 2.68±0.68                     | 2.43±0.78                      | 3.51±0.67                |
| t                                    | 0.594                                  | -2.506           | 0.601             | -0.526                            | -1.841                 | 1.319                   | 1.720                 | -0.196                     | -1.151                        | 1.587                          | -1.762                   |
| <i>P</i>                             | 0.553                                  | 0.012*           | 0.548             | 0.599                             | 0.066                  | 0.188                   | 0.086                 | 0.845                      | 0.250                         | 0.113                          | 0.078                    |
| <b>Family structure</b>              |                                        |                  |                   |                                   |                        |                         |                       |                            |                               |                                |                          |
| Living with parents and grandparents | 4.06±0.53                              | 4.09±0.57        | 4.03±0.83         | 3.44±0.82                         | 3.23±0.84              | 3.29±0.72               | 3.07±0.66             | 2.47±0.56                  | 2.66±0.67                     | 2.57±0.79                      | 3.42±0.67                |
| Living with parents                  | 4.17±0.49                              | 4.15±0.57        | 4.09±0.77         | 3.47±0.77                         | 3.21±0.86              | 3.25±0.78               | 2.93±0.62             | 2.42±0.58                  | 2.64±0.69                     | 2.40±0.82                      | 3.51±0.68                |
| t                                    | -2.934                                 | -1.587           | -1.091            | -0.620                            | 0.306                  | 0.628                   | 3.318                 | 1.188                      | 0.533                         | 2.953                          | -1.967                   |
| <i>P</i>                             | 0.003**                                | 0.113            | 0.276             | 0.536                             | 0.760                  | 0.530                   | 0.001**               | 0.235                      | 0.594                         | 0.003**                        | 0.049*                   |

| <b>Variables at T1</b>                | <b>Encouragement of Healthy Eating</b> | <b>Modelling</b> | <b>Monitoring</b> | <b>Content Restricted Feeding</b> | <b>Pressure to Eat</b> | <b>Food as a Reward</b> | <b>Food Fussiness</b> | <b>Food Responsiveness</b> | <b>Satiety Responsiveness</b> | <b>Unhealthy Eating Habits</b> | <b>Initiative Eating</b> |
|---------------------------------------|----------------------------------------|------------------|-------------------|-----------------------------------|------------------------|-------------------------|-----------------------|----------------------------|-------------------------------|--------------------------------|--------------------------|
| <b>Household income/year</b>          |                                        |                  |                   |                                   |                        |                         |                       |                            |                               |                                |                          |
| Below average                         | 4.13±0.50                              | 4.11±0.56        | 4.06±0.83         | 3.44±0.82                         | 3.20±0.89              | 3.36±0.76               | 2.97±0.67             | 2.51±0.54                  | 2.66±0.69                     | 2.53±0.80                      | 3.51±0.65                |
| Above average                         | 4.09±0.52                              | 4.11±0.57        | 4.06±0.78         | 3.46±0.78                         | 3.24±0.82              | 3.21±0.74               | 3.03±0.63             | 2.40±0.58                  | 2.64±0.68                     | 2.47±0.82                      | 3.43±0.69                |
| <i>t</i>                              | 0.995                                  | 0.143            | -0.061            | -0.274                            | -0.621                 | 2.705                   | -1.283                | 2.767                      | 0.380                         | 1.049                          | 1.672                    |
| <i>P</i>                              | 0.320                                  | 0.886            | 0.952             | 0.784                             | 0.535                  | 0.007**                 | 0.200                 | 0.006**                    | 0.704                         | 0.294                          | 0.095                    |
| <b>Child age</b>                      |                                        |                  |                   |                                   |                        |                         |                       |                            |                               |                                |                          |
| <i>r</i>                              | -0.023                                 | -0.009           | -0.030            | -0.025                            | -0.016                 | 0.072                   | 0.018                 | -0.022                     | 0.063                         | 0.020                          | -0.014                   |
| <i>P</i>                              | 0.511                                  | 0.792            | 0.389             | 0.471                             | 0.642                  | 0.036*                  | 0.591                 | 0.513                      | 0.067                         | 0.553                          | 0.676                    |
| <b>Child BMI Z score</b>              |                                        |                  |                   |                                   |                        |                         |                       |                            |                               |                                |                          |
| <i>r</i>                              | -0.111**                               | -0.055           | -0.047            | -0.002                            | -0.144***              | -0.004                  | 0.068*                | 0.204***                   | -0.237***                     | -0.180***                      | 0.125***                 |
| <i>P</i>                              | 0.001                                  | 0.109            | 0.167             | 0.943                             | 0.000                  | 0.917                   | 0.048                 | 0.000                      | 0.000                         | 0.000                          | 0.000                    |
| <b>Caregivers' age</b>                |                                        |                  |                   |                                   |                        |                         |                       |                            |                               |                                |                          |
| <i>r</i>                              | -0.015                                 | -0.020           | 0.012             | -0.061                            | 0.045                  | 0.015                   | -0.060                | -0.056                     | -0.013                        | 0.003                          | -0.006                   |
| <i>P</i>                              | 0.668                                  | 0.566            | 0.733             | 0.073                             | 0.186                  | 0.664                   | 0.081                 | 0.103                      | 0.710                         | 0.932                          | 0.857                    |
| <b>Concern about child overweight</b> |                                        |                  |                   |                                   |                        |                         |                       |                            |                               |                                |                          |
| <i>r</i>                              | -0.098                                 | -0.074           | 0.017             | 0.093                             | -0.110                 | 0.020                   | 0.013                 | 0.235                      | -0.228                        | -0.210                         | 0.189                    |

| <b>Variables at T1</b>                 | <b>Encouragement of Healthy Eating</b> | <b>Modelling</b> | <b>Monitoring</b> | <b>Content Restricted Feeding</b> | <b>Pressure to Eat</b> | <b>Food as a Reward</b> | <b>Food Fussiness</b> | <b>Food Responsiveness</b> | <b>Satiety Responsiveness</b> | <b>Unhealthy Eating Habits</b> | <b>Initiative Eating</b> |
|----------------------------------------|----------------------------------------|------------------|-------------------|-----------------------------------|------------------------|-------------------------|-----------------------|----------------------------|-------------------------------|--------------------------------|--------------------------|
| <i>P</i>                               | 0.004**                                | 0.031*           | 0.628             | 0.007**                           | 0.001**                | 0.563                   | 0.707                 | 0.000***                   | 0.000***                      | 0.000***                       | 0.000***                 |
| <b>Concern about child underweight</b> |                                        |                  |                   |                                   |                        |                         |                       |                            |                               |                                |                          |
| <i>r</i>                               | -0.039                                 | 0.016            | 0.057             | -0.006                            | 0.235                  | -0.038                  | 0.093                 | -0.122                     | 0.427                         | 0.337                          | -0.230                   |
| <i>P</i>                               | 0.249                                  | 0.644            | 0.095             | 0.854                             | 0.000***               | 0.265                   | 0.006**               | 0.000***                   | 0.000***                      | 0.000***                       | 0.000***                 |
| <b>Perception of child weight</b>      |                                        |                  |                   |                                   |                        |                         |                       |                            |                               |                                |                          |
| <i>r</i>                               | -0.076                                 | -0.030           | -0.020            | 0.038                             | -0.196                 | -0.006                  | -0.058                | 0.259                      | -0.406                        | -0.310                         | 0.244                    |
| <i>P</i>                               | 0.026*                                 | 0.384            | 0.563             | 0.271                             | 0.000*                 | 0.862                   | 0.088                 | 0.000***                   | 0.000***                      | 0.000***                       | 0.000***                 |
| <b>Caregivers depression</b>           |                                        |                  |                   |                                   |                        |                         |                       |                            |                               |                                |                          |
| <i>r</i>                               | -0.117                                 | -0.142           | -0.026            | 0.007                             | 0.048                  | -0.030                  | 0.082                 | 0.061                      | 0.166                         | 0.126                          | -0.091                   |
| <i>P</i>                               | 0.001**                                | 0.000***         | 0.440             | 0.842                             | 0.162                  | 0.375                   | 0.016*                | 0.074                      | 0.000***                      | 0.000***                       | 0.008**                  |
| <b>Inhibition control</b>              |                                        |                  |                   |                                   |                        |                         |                       |                            |                               |                                |                          |
| <i>r</i>                               | 0.213                                  | 0.204            | 0.095             | 0.056                             | -0.054                 | 0.055                   | -0.167                | -0.069                     | -0.184                        | -0.220                         | 0.222                    |
| <i>P</i>                               | 0.000***                               | 0.000***         | 0.005**           | 0.101                             | 0.114                  | 0.110                   | 0.000***              | 0.044*                     | 0.000***                      | 0.000***                       | 0.000***                 |
| <b>Emotionality</b>                    |                                        |                  |                   |                                   |                        |                         |                       |                            |                               |                                |                          |
| <i>r</i>                               | -0.123                                 | -0.109           | 0.003             | 0.001                             | 0.165                  | 0.092                   | 0.301                 | 0.147                      | 0.195                         | 0.235                          | -0.147                   |
| <i>P</i>                               | 0.000***                               | 0.001**          | 0.921             | 0.984                             | 0.000***               | 0.007**                 | 0.000***              | 0.000***                   | 0.000***                      | 0.000***                       | 0.000***                 |

*Notes.* \* $P < 0.05$ , \*\* $P < 0.01$ , \*\*\* $P < 0.001$ .

**Supplementary Table S2.** Correlations between parental feeding practices and child eating behaviors ( $n = 853$ ).

|                                    | T1 FF    | T1 FR   | T1 SR    | T1 UE    | T1 IE    | T2 FF    | T2 FR   | T2 SR    | T2 UE    | T2 IE    |
|------------------------------------|----------|---------|----------|----------|----------|----------|---------|----------|----------|----------|
| T1 Encouragement of Healthy Eating | -0.199** | -0.030  | -0.117** | -0.104** | 0.148**  | -0.196** | 0.012   | -0.108** | -0.122** | 0.140**  |
| T1 Modelling                       | -0.108** | -0.019  | -0.143** | -0.190** | 0.146**  | -0.133** | -0.029  | -0.083*  | -0.190** | 0.123**  |
| T1 Monitoring                      | -0.058   | 0.017   | -0.028   | 0.011    | 0.006    | -0.060   | 0.056   | -0.011   | -0.059   | 0.024    |
| T1 Content Restricted Feeding      | -0.053   | 0.077*  | -0.043   | -0.074*  | 0.076*   | -0.104** | 0.060   | -0.064   | -0.134** | 0.080*   |
| T1 Pressure to Eat                 | 0.128**  | 0.057   | 0.279**  | 0.397**  | -0.301** | 0.037    | -0.007  | 0.209**  | 0.316**  | -0.224** |
| T1 Use of Food as a Reward         | 0.115**  | 0.147** | 0.043    | 0.120**  | -0.021   | 0.090**  | 0.046   | 0.026    | 0.103**  | -0.043   |
| T2 Encouragement of Healthy Eating | -0.177** | -0.008  | -0.099** | -0.088** | 0.148**  | -0.257** | 0.022   | -0.113** | -0.146** | 0.202**  |
| T2 Modelling                       | -0.097** | 0.002   | -0.082*  | -0.129** | 0.102**  | -0.165** | 0.013   | -0.117** | -0.227** | 0.211**  |
| T2 Monitoring                      | -0.046   | 0.006   | -0.013   | 0.000    | 0.044    | -0.087*  | 0.009   | -0.010   | -0.083*  | 0.109**  |
| T2 Content Restricted Feeding      | -0.093** | -0.011  | -0.081*  | -0.049   | 0.025    | -0.100** | 0.002   | -0.055   | -0.134** | 0.100**  |
| T2 Pressure to Eat                 | 0.083*   | 0.037   | 0.214**  | 0.313**  | -0.239** | 0.069*   | 0.099** | 0.204**  | 0.315**  | -0.234** |
| T2 Use of Food as a Reward         | 0.157**  | 0.094** | 0.101**  | 0.136**  | -0.076*  | 0.133**  | 0.120** | 0.117**  | 0.190**  | -0.038   |

**Notes.** FF: food fussiness; FR: food responsiveness; SR: satiety responsiveness; UE: unhealthy eating habits; IE: initiative eating; \* $P < 0.05$ , \*\* $P < 0.01$ .

**Supplementary Table S3.** Model fit of each cross-lag model ( $n = 853$ ).

| <b>Feeding practices</b>        | <b>Eating behaviors</b> | $\chi^2$ | <i>df</i> | <b>CFI</b> | <b>RMSEA</b> | <b>RMR</b> |
|---------------------------------|-------------------------|----------|-----------|------------|--------------|------------|
| Encouragement of Healthy Eating | Food Fussiness          | 105.991  | 18        | 0.905      | 0.076        | 0.057      |
| Modelling                       | Food Fussiness          | 82.838   | 18        | 0.917      | 0.065        | 0.046      |
| Monitoring                      | Food Fussiness          | 53.976   | 18        | 0.952      | 0.048        | 0.033      |
| Content Restricted Feeding      | Food Fussiness          | 43.321   | 18        | 0.964      | 0.041        | 0.026      |
| Pressure to Eat                 | Food Fussiness          | 122.600  | 18        | 0.883      | 0.080        | 0.059      |
| Use of Food as a Reward         | Food Fussiness          | 63.210   | 20        | 0.939      | 0.054        | 0.032      |
| Encouragement of Healthy Eating | Food Responsiveness     | 92.769   | 21        | 0.902      | 0.063        | 0.047      |
| Modelling                       | Food Responsiveness     | 64.325   | 21        | 0.929      | 0.049        | 0.036      |
| Monitoring                      | Food Responsiveness     | 38.222   | 21        | 0.970      | 0.031        | 0.024      |
| Content Restricted Feeding      | Food Responsiveness     | 38.268   | 21        | 0.969      | 0.031        | 0.023      |
| Pressure to Eat                 | Food Responsiveness     | 113.678  | 21        | 0.888      | 0.072        | 0.063      |
| Use of Food as a Reward         | Food Responsiveness     | 48.256   | 21        | 0.954      | 0.039        | 0.027      |
| Encouragement of Healthy Eating | Satiety Responsiveness  | 106.019  | 21        | 0.922      | 0.069        | 0.050      |
| Modelling                       | Satiety Responsiveness  | 78.532   | 21        | 0.941      | 0.057        | 0.041      |
| Monitoring                      | Satiety Responsiveness  | 50.473   | 21        | 0.968      | 0.041        | 0.028      |
| Content Restricted Feeding      | Satiety Responsiveness  | 48.036   | 21        | 0.970      | 0.039        | 0.025      |
| Pressure to Eat                 | Satiety Responsiveness  | 110.091  | 21        | 0.919      | 0.071        | 0.065      |
| Use of Food as a Reward         | Satiety Responsiveness  | 61.369   | 21        | 0.956      | 0.047        | 0.031      |
| Encouragement of Healthy Eating | Unhealthy Eating Habits | 106.557  | 24        | 0.926      | 0.064        | 0.048      |
| Modelling                       | Unhealthy Eating Habits | 74.269   | 24        | 0.952      | 0.050        | 0.038      |

|                                 |                         |         |    |       |       |       |
|---------------------------------|-------------------------|---------|----|-------|-------|-------|
| Monitoring                      | Unhealthy Eating Habits | 48.281  | 24 | 0.975 | 0.034 | 0.025 |
| Content Restricted Feeding      | Unhealthy Eating Habits | 44.990  | 24 | 0.978 | 0.032 | 0.022 |
| Pressure to Eat                 | Unhealthy Eating Habits | 105.504 | 24 | 0.933 | 0.063 | 0.060 |
| Use of Food as a Reward         | Unhealthy Eating Habits | 54.479  | 24 | 0.969 | 0.039 | 0.026 |
| Encouragement of Healthy Eating | Initiative eating       | 95.036  | 24 | 0.922 | 0.059 | 0.046 |
| Modelling                       | Initiative eating       | 65      | 24 | 0.949 | 0.045 | 0.035 |
| Monitoring                      | Initiative eating       | 37.152  | 24 | 0.982 | 0.025 | 0.022 |
| Content Restricted Feeding      | Initiative eating       | 35.365  | 24 | 0.984 | 0.024 | 0.019 |
| Pressure to Eat                 | Initiative eating       | 98.341  | 24 | 0.921 | 0.060 | 0.057 |
| Use of Food as a Reward         | Initiative eating       | 47.118  | 24 | 0.968 | 0.034 | 0.024 |

**Notes.** CFI: Comparative Fit Index; RMSEA: Root Mean Square Error of Approximation; RMR: Root Mean-square Residual.



**Supplementary Table S4.** Strengthening the Reporting of Observational studies in Epidemiology (STROBE) guidelines for observational studies.

|                      | Item No. | Recommendation                                                                                                                                                                     | Page No. | Relevant text from manuscript               |
|----------------------|----------|------------------------------------------------------------------------------------------------------------------------------------------------------------------------------------|----------|---------------------------------------------|
| Title and abstract   | 1        | (a) Indicate the study’s design with a commonly used term in the title or the abstract                                                                                             | p. 1     | “longitudinal study...”                     |
|                      |          | (b) Provide in the abstract an informative and balanced summary of what was done and what was found                                                                                | p. 1     | See Abstract                                |
| Introduction         |          |                                                                                                                                                                                    |          |                                             |
| Background/rationale | 2        | Explain the scientific background and rationale for the investigation being reported                                                                                               | p. 2-2   | See Introduction                            |
| Objectives           | 3        | State specific objectives, including any prespecified hypotheses                                                                                                                   | p. 2     | See Introduction                            |
| Methods              |          |                                                                                                                                                                                    |          |                                             |
| Study design         | 4        | Present key elements of study design early in the paper                                                                                                                            | p. 3     | See Methods > Study design and participants |
| Setting              | 5        | Describe the setting, locations, and relevant dates, including periods of recruitment, exposure, follow-up, and data collection                                                    | p. 3     | See Methods > Study design and participants |
| Participants         | 6        | (a) Cohort study—Give the eligibility criteria, and the sources and methods of selection of participants. Describe methods of follow-up                                            | p. 3     | See Methods > Study design and participants |
|                      |          | Case-control study—Give the eligibility criteria, and the sources and methods of case ascertainment and control selection. Give the rationale for the choice of cases and controls |          |                                             |

|                              |    |                                                                                                                                                                                      |        |                                                                                |
|------------------------------|----|--------------------------------------------------------------------------------------------------------------------------------------------------------------------------------------|--------|--------------------------------------------------------------------------------|
|                              |    | <i>Cross-sectional study</i> —Give the eligibility criteria, and the sources and methods of selection of participants                                                                |        |                                                                                |
|                              |    | <i>(b) Cohort study</i> —For matched studies, give matching criteria and number of exposed and unexposed                                                                             | n/a    | n/a                                                                            |
|                              |    | <i>Case-control study</i> —For matched studies, give matching criteria and the number of controls per case                                                                           |        |                                                                                |
| Variables                    | 7  | Clearly define all outcomes, exposures, predictors, potential confounders, and effect modifiers. Give diagnostic criteria, if applicable                                             | P. 3-4 | See Methods > Demographic and socioeconomic data, feeding, eating, covariates. |
| Data sources/<br>measurement | 8* | For each variable of interest, give sources of data and details of methods of assessment (measurement). Describe comparability of assessment methods if there is more than one group | p. 3-5 | See Methods > Demographic and socioeconomic data, feeding, eating, covariates. |
| Bias                         | 9  | Describe any efforts to address potential sources of bias                                                                                                                            | p. 6-8 | See Methods > Demographic and socioeconomic data, covariates.                  |
| Study size                   | 10 | Explain how the study size was arrived at                                                                                                                                            | p.3    | See Methods > Study design and participants                                    |
| Quantitative variables       | 11 | Explain how quantitative variables were handled in the analyses. If applicable, describe which groupings were chosen and why                                                         | p. 3,5 | See Methods > Study design and participants, statistical analysis              |

|                     |     |                                                                                                                                                                                                   |        |                                             |
|---------------------|-----|---------------------------------------------------------------------------------------------------------------------------------------------------------------------------------------------------|--------|---------------------------------------------|
| Statistical methods | 12  | (a) Describe all statistical methods, including those used to control for confounding                                                                                                             | p. 5   | See Methods > statistical analysis          |
|                     |     | (b) Describe any methods used to examine subgroups and interactions                                                                                                                               | n/a    | n/a                                         |
|                     |     | (c) Explain how missing data were addressed                                                                                                                                                       | p. 3,5 | See Methods > Study design and participants |
|                     |     | (d) <i>Cohort study</i> —If applicable, explain how loss to follow-up was addressed                                                                                                               | p. 3,5 | See Methods > statistical analysis          |
|                     |     | <i>Case-control study</i> —If applicable, explain how matching of cases and controls was addressed                                                                                                |        |                                             |
|                     |     | <i>Cross-sectional study</i> —If applicable, describe analytical methods taking account of sampling strategy                                                                                      |        |                                             |
|                     |     | (e) Describe any sensitivity analyses                                                                                                                                                             | n/a    | n/a                                         |
| <b>Results</b>      |     |                                                                                                                                                                                                   |        |                                             |
| Participants        | 13* | (a) Report numbers of individuals at each stage of study—eg numbers potentially eligible, examined for eligibility, confirmed eligible, included in the study, completing follow-up, and analysed | p. 3   | See Methods > Study design and participants |
|                     |     | (b) Give reasons for non-participation at each stage                                                                                                                                              | p. 3   | See Methods > Study design and participants |
|                     |     | (c) Consider use of a flow diagram                                                                                                                                                                | n/a    | n/a                                         |

|                  |     |                                                                                                                                          |        |                                                                                                                                                       |
|------------------|-----|------------------------------------------------------------------------------------------------------------------------------------------|--------|-------------------------------------------------------------------------------------------------------------------------------------------------------|
| Descriptive data | 14* | (a) Give characteristics of study participants (eg demographic, clinical, social) and information on exposures and potential confounders | p. 5-6 | See Results > Demographic and socioeconomic characteristics of the participants at baseline and Table 1                                               |
|                  |     | (b) Indicate number of participants with missing data for each variable of interest                                                      | n/a    | n/a                                                                                                                                                   |
|                  |     | (c) <i>Cohort study</i> —Summarise follow-up time (eg, average and total amount)                                                         | p. 5-7 | See Results > Study and participant characteristics; Stability and continuity of parental feeding practices and child eating behaviors; and Table 1,2 |
| Outcome data     | 15* | <i>Cohort study</i> —Report numbers of outcome events or summary measures over time                                                      | p. 5-7 | See Results > Stability and continuity of parental feeding practices and child eating behaviors                                                       |
|                  |     | <i>Case-control study</i> —Report numbers in each exposure category, or summary measures of exposure                                     | n/a    | n/a                                                                                                                                                   |
|                  |     | <i>Cross-sectional study</i> —Report numbers of outcome events or summary measures                                                       | n/a    | n/a                                                                                                                                                   |

|                   |    |                                                                                                                                                                                                              |         |                                                                                                                                                                                                                                                                                                                                                 |
|-------------------|----|--------------------------------------------------------------------------------------------------------------------------------------------------------------------------------------------------------------|---------|-------------------------------------------------------------------------------------------------------------------------------------------------------------------------------------------------------------------------------------------------------------------------------------------------------------------------------------------------|
| Main results      | 16 | (a) Give unadjusted estimates and, if applicable, confounder-adjusted estimates and their precision (eg, 95% confidence interval). Make clear which confounders were adjusted for and why they were included | p. 7-10 | See Results > Bidirectional associations of parental feeding practices with child eating behaviors; figure 1,2; supplementary table 1,2.<br><br>(Confounders were listed and explained in Background > while controlling for potential covariates; Result > Some demographic variables... were added to each cross-lagged model as covariates.) |
|                   |    | (b) Report category boundaries when continuous variables were categorized                                                                                                                                    | p.6     | See Results > table 1, 2; and supplementary table 1,2.                                                                                                                                                                                                                                                                                          |
|                   |    | (c) If relevant, consider translating estimates of relative risk into absolute risk for a meaningful time period                                                                                             | n/a     | n/a                                                                                                                                                                                                                                                                                                                                             |
| Other analyses    | 17 | Report other analyses done—eg analyses of subgroups and interactions, and sensitivity analyses                                                                                                               | n/a     | n/a                                                                                                                                                                                                                                                                                                                                             |
| <b>Discussion</b> |    |                                                                                                                                                                                                              |         |                                                                                                                                                                                                                                                                                                                                                 |

|                          |    |                                                                                                                                                                            |          |                                                                                                           |
|--------------------------|----|----------------------------------------------------------------------------------------------------------------------------------------------------------------------------|----------|-----------------------------------------------------------------------------------------------------------|
| Key results              | 18 | Summarise key results with reference to study objectives                                                                                                                   | p. 7-10  | See Discussion > The bidirectional associations of parental feeding practices with child eating behaviors |
| Limitations              | 19 | Discuss limitations of the study, taking into account sources of potential bias or imprecision. Discuss both direction and magnitude of any potential bias                 | p. 13    | See Discussion > There are several limitations...                                                         |
| Interpretation           | 20 | Give a cautious overall interpretation of results considering objectives, limitations, multiplicity of analyses, results from similar studies, and other relevant evidence | p. 11-13 | See Discussion, Conclusion                                                                                |
| Generalisability         | 21 | Discuss the generalisability (external validity) of the study results                                                                                                      | p. 13    | See Discussion > There are several limitations...                                                         |
| <b>Other information</b> |    |                                                                                                                                                                            |          |                                                                                                           |
| Funding                  | 22 | Give the source of funding and the role of the funders for the present study and, if applicable, for the original study on which the present article is based              | p. 14    | See Funding information                                                                                   |

\*Give information separately for cases and controls in case-control studies and, if applicable, for exposed and unexposed groups in cohort and cross-sectional studies.

**Note:** An Explanation and Elaboration article discusses each checklist item and gives methodological background and published examples of transparent reporting. The STROBE checklist is best used in conjunction with this article (freely available on the Web sites of PLoS Medicine at <http://www.plosmedicine.org/>, Annals of Internal Medicine at <http://www.annals.org/>, and Epidemiology at <http://www.epidem.com/>). Information on the STROBE Initiative is available at [www.strobe-statement.org](http://www.strobe-statement.org).
